# Supplementary material for: Supported two- and three-dimensional vanadium oxide species on the surface of β-SiC
Source: Royal Society of Chemistry journal article supplement (doi:10.1039/c7cy01036b), 2017-01-01

### **Support Information: Supported two- and three-dimensional vanadium oxide species on the surface of $\beta$ -SiC**

Carlos A. Carrero,<sup>a</sup> Samuel P. Burt,<sup>c</sup> Fangying Huang,<sup>b</sup> Juan M. Venegas,<sup>c</sup> Alyssa M. Love,<sup>b</sup> Philipp Mueller,<sup>b</sup> Hao Zhu,<sup>b</sup> Joseph T. Grant,<sup>b</sup> Ricardo Mathison,<sup>c</sup> Michael Hanrahan,<sup>d</sup> Aaron Rossini,<sup>d</sup> Madelyn Ball,<sup>c</sup> James Dumesic,<sup>c</sup> and Ive Hermans<sup>b,c\*</sup>

S.1) Set of data to accurately measure:

BET surface area (m<sup>2</sup>/g)

| Sample                         | BET-I | BET-II | BET-III | Average     | STDEV |
|--------------------------------|-------|--------|---------|-------------|-------|
| $\beta$ -SiC <sub>p</sub>      | 32.1  | 28.3   | 29.4    | <b>29.9</b> | 1.6   |
| 2V/ $\beta$ -SiC <sub>p</sub>  | 25.6  | 28.5   | 25.8    | <b>26.6</b> | 1.3   |
| $\beta$ -SiC <sub>o</sub>      | 29.3  | 29.5   | 29      | <b>29.3</b> | 0.2   |
| 1V/ $\beta$ -SiC <sub>o</sub>  | 27.1  | 26.6   | 26.2    | <b>26.6</b> | 0.4   |
| 2V/ $\beta$ -SiC <sub>o</sub>  | 24.6  | 26.3   | 26.8    | <b>25.9</b> | 0.9   |
| 4V/ $\beta$ -SiC <sub>o</sub>  | 14.9  | 12.4   | 15.8    | <b>14.4</b> | 1.4   |
| 6V/ $\beta$ -SiC <sub>o</sub>  | 14.2  | 14.7   | 13.7    | <b>14.2</b> | 0.4   |
| 8V/ $\beta$ -SiC <sub>o</sub>  | 13.5  | 11.8   | 12.9    | <b>12.7</b> | 0.7   |
| 10V/ $\beta$ -SiC <sub>o</sub> | 12.1  | 10.4   | 11.9    | <b>11.5</b> | 0.8   |

V loading (w.t. %)

| Sample                         | ICP-I | ICP-II | ICP-III | Average | STDEV |
|--------------------------------|-------|--------|---------|---------|-------|
| $\beta$ -SiC <sub>p</sub>      | -     |        |         |         |       |
| 2V/ $\beta$ -SiC <sub>p</sub>  | 1.5   | 2.1    | 1.9     | 1.8     | 0.2   |
| $\beta$ -SiC <sub>o</sub>      | -     |        |         |         |       |
| 1V/ $\beta$ -SiC <sub>o</sub>  | 1.4   | 0.9    | 0.7     | 1.0     | 0.3   |
| 2V/ $\beta$ -SiC <sub>o</sub>  | 1.3   | 2.1    | 2.5     | 2.0     | 0.5   |
| 4V/ $\beta$ -SiC <sub>o</sub>  | 4.1   | 4.3    | 4.5     | 4.3     | 0.2   |
| 6V/ $\beta$ -SiC <sub>o</sub>  | 6.1   | 6.3    | 5.4     | 5.9     | 0.4   |
| 8V/ $\beta$ -SiC <sub>o</sub>  | 7.9   | 7.8    | 7.9     | 7.9     | 0.1   |
| 10V/ $\beta$ -SiC <sub>o</sub> | 9.6   | 9.8    | 10.1    | 9.8     | 0.2   |

S.2) Turn over frequency (TOF) for propane consumption as a function of V coverage for the studied V/ $\beta$ -SiC<sub>0</sub> catalysts at 490 C. C<sub>3</sub>H<sub>8</sub>/O<sub>2</sub>/N<sub>2</sub> = 6:3:11 composition. The inverse weight hourly space velocity (WHSV<sup>-1</sup>) was varied between 40-250 kg<sub>cat</sub>·s/m<sup>3</sup>.

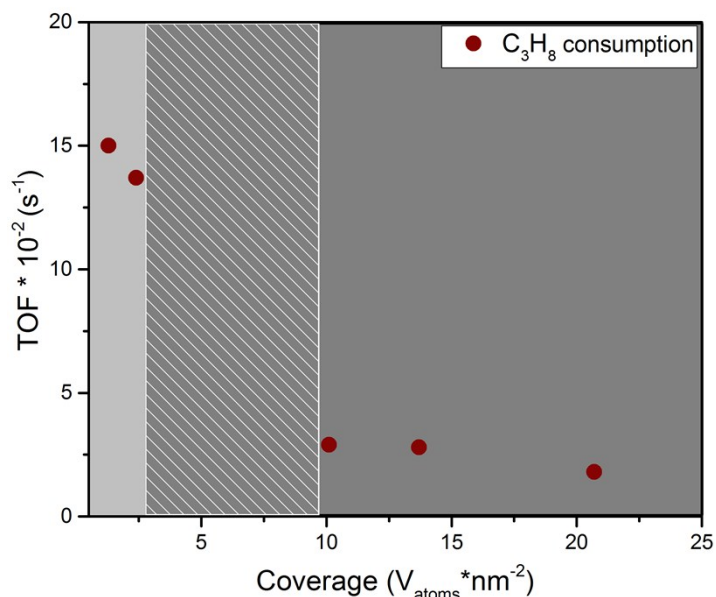

S.3) The used temperature program (top left), TGA-DSC data (top right), and the MS data for O<sub>2</sub> and CO<sub>2</sub> (bottom left). At around 400 °C under air, the formation of CO<sub>2</sub> begins and steadily increases. Once air is switched to N<sub>2</sub>, CO<sub>2</sub> production stops. The increase in mass, despite of the formation of CO<sub>2</sub>, occurs basically because SiC + 2O<sub>2</sub> -> SiO<sub>2</sub> + CO<sub>2</sub>. As the molar mass of SiC is lower than SiO<sub>2</sub>, this results in an increase in total mass.

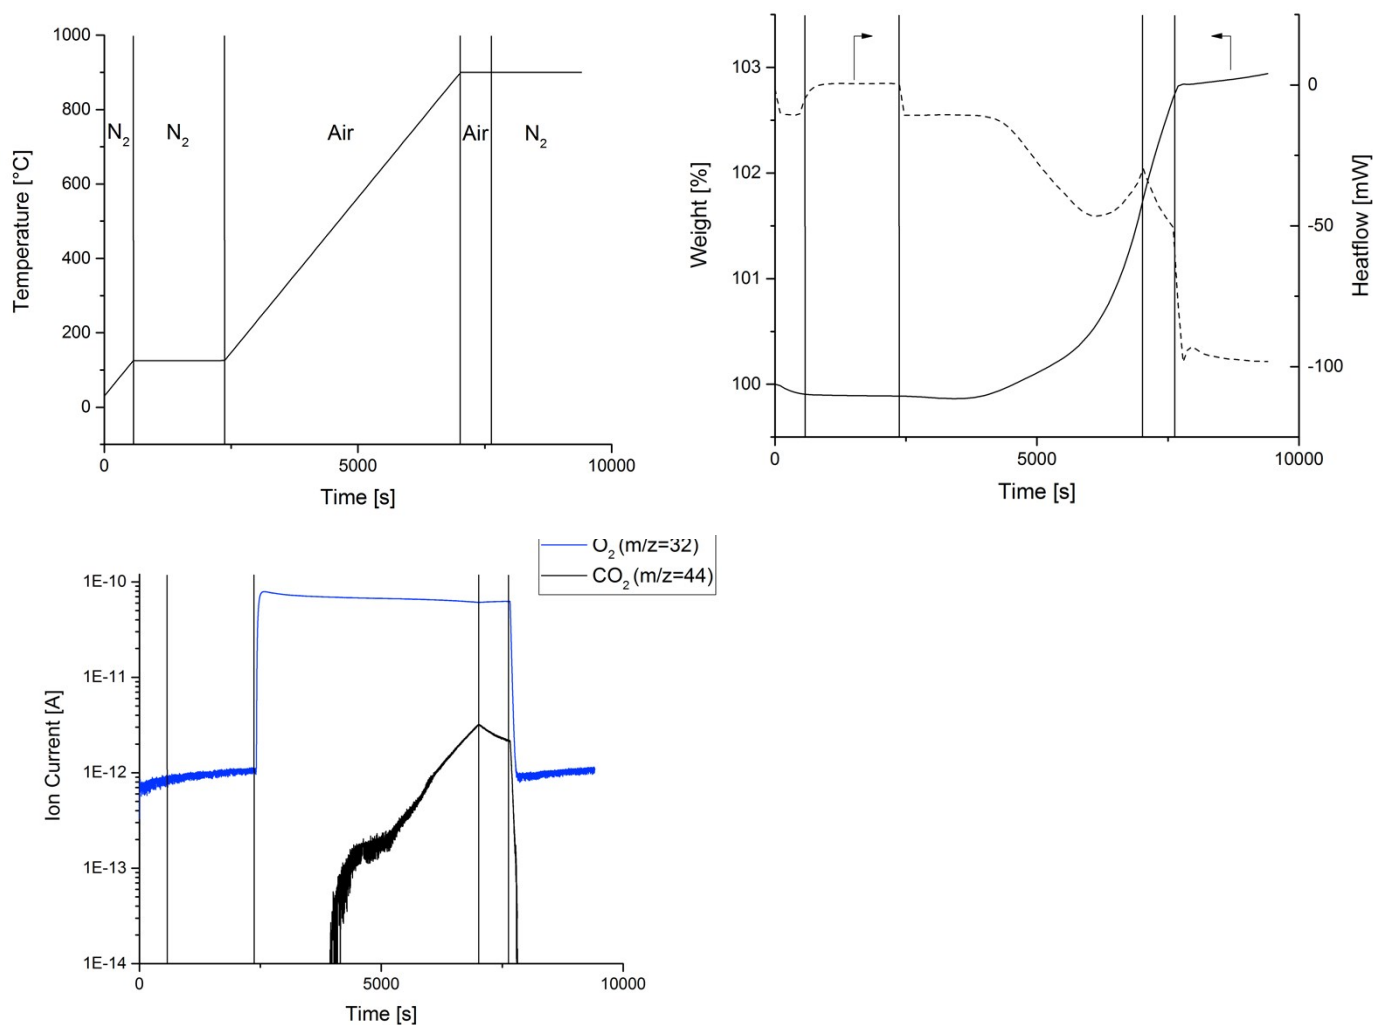

S.4) EDS Analysis for V/ $\beta$ -SiC and V/SiO<sub>2</sub> samples. Whereas the formation of “V-islands” can be observed both at low ( $2.4 V_{\text{atoms}} \cdot \text{nm}^{-2}$ ) and high ( $13.7 V_{\text{atoms}} \cdot \text{nm}^{-2}$ ) V coverage on  $\beta$ -SiC, a more uniform V distribution is observed on V/SiO<sub>2</sub> samples with similar V coverage.

2V/ $\beta$ -SiC ( $\theta = 2.4 V_{\text{atoms}} \cdot \text{nm}^{-2}$ )

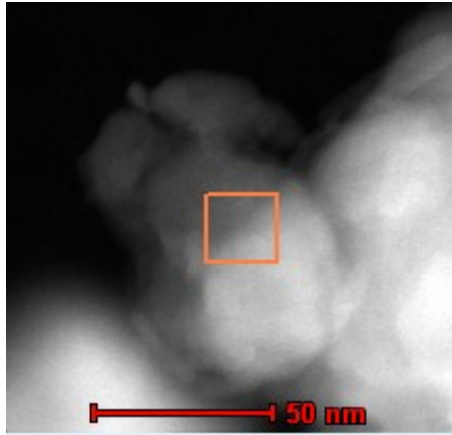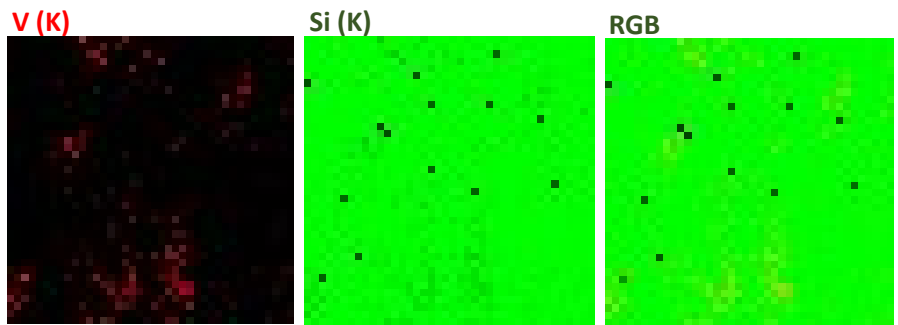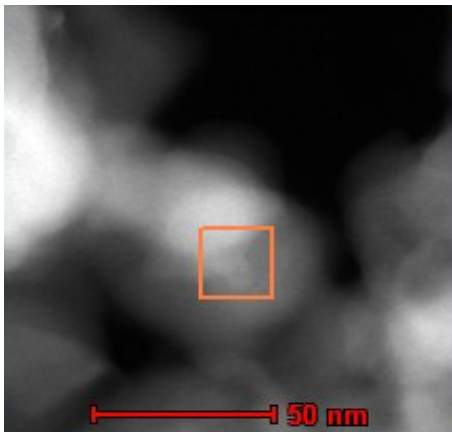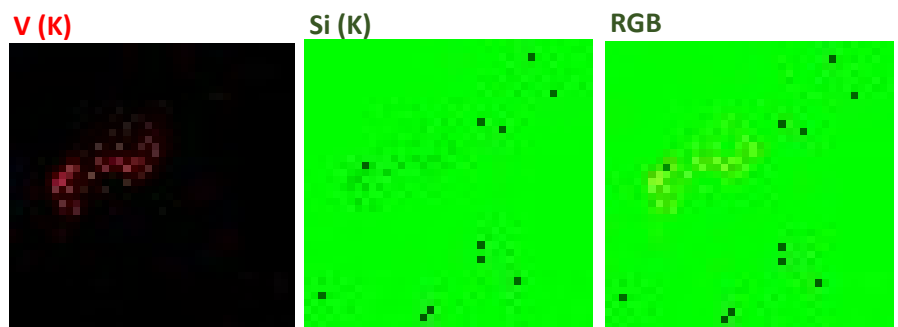

6V/ $\beta$ -SiC ( $\theta = 13.7 V_{\text{atoms}} \cdot \text{nm}^{-2}$ )

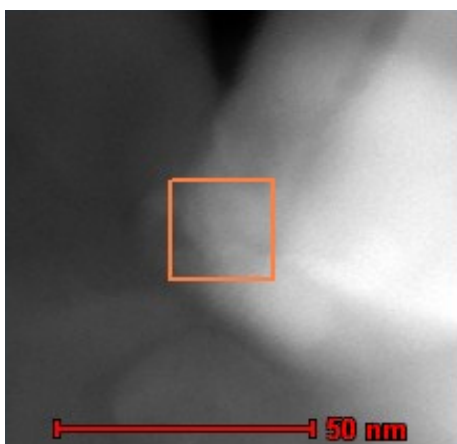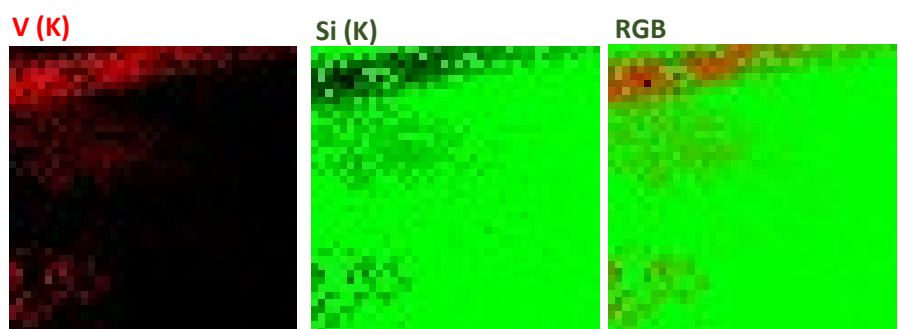

2V/SiO<sub>2</sub> ( $\theta = 1.3 \text{ V}_{\text{atoms}} \cdot \text{nm}^{-2}$ )

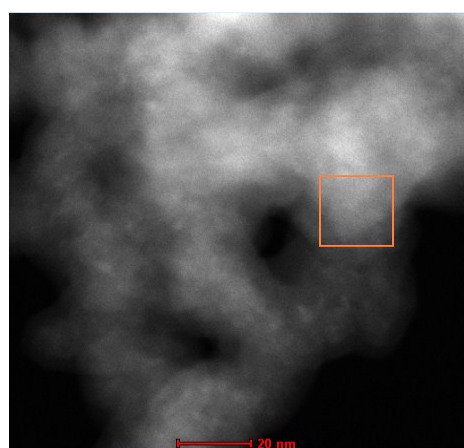

V (K)

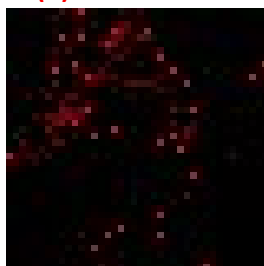

Si (K)

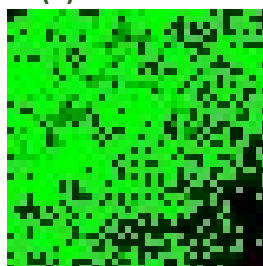

RGB

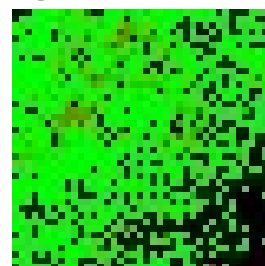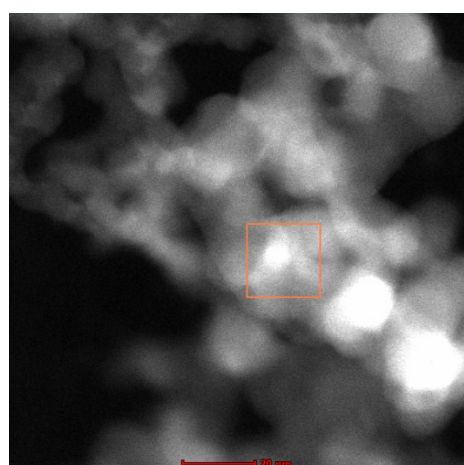

V (K)

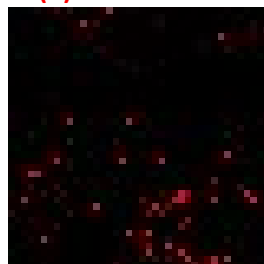

Si (K)

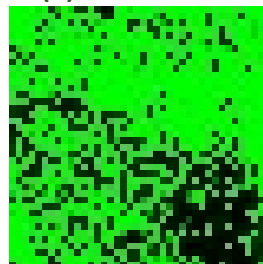

RGB

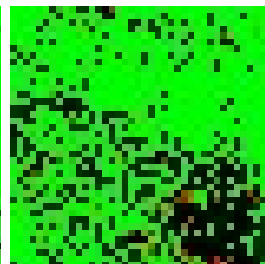

7V/SiO<sub>2</sub> ( $\theta = 13.4 \text{ V}_{\text{atoms}} \cdot \text{nm}^{-2}$ )

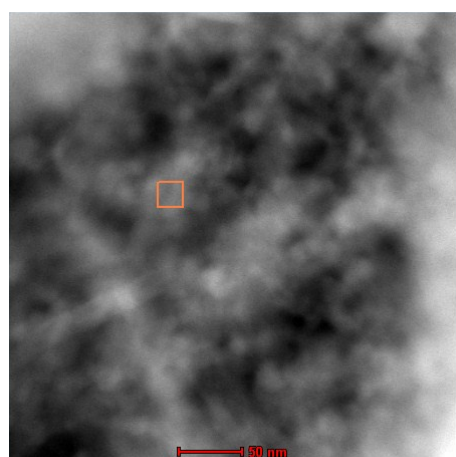

V (K)

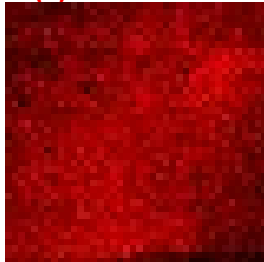

Si (K)

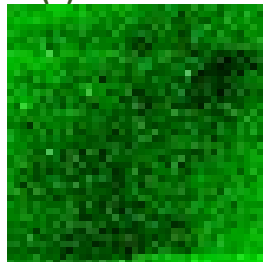

RGB

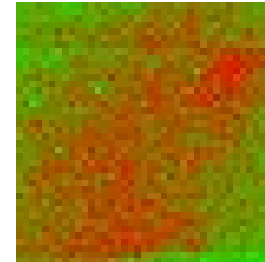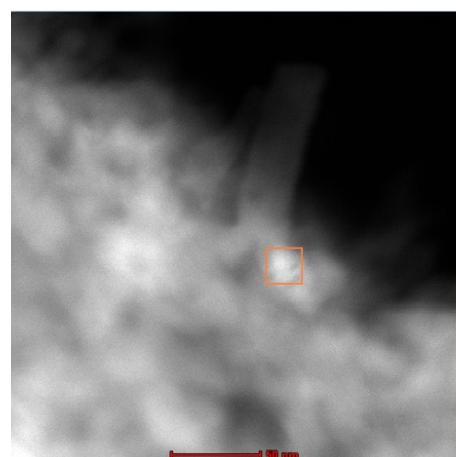

V (K)

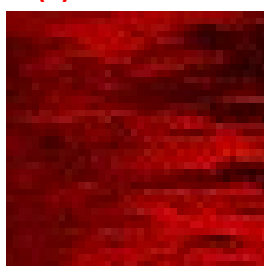

Si (K)

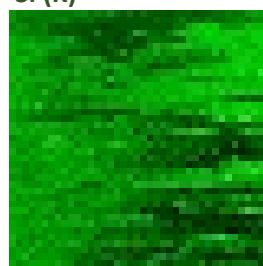

RGB

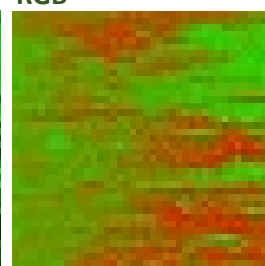

S.5) XPS C1s spectra of  $\beta$ -SiC with various vanadium oxide loading.

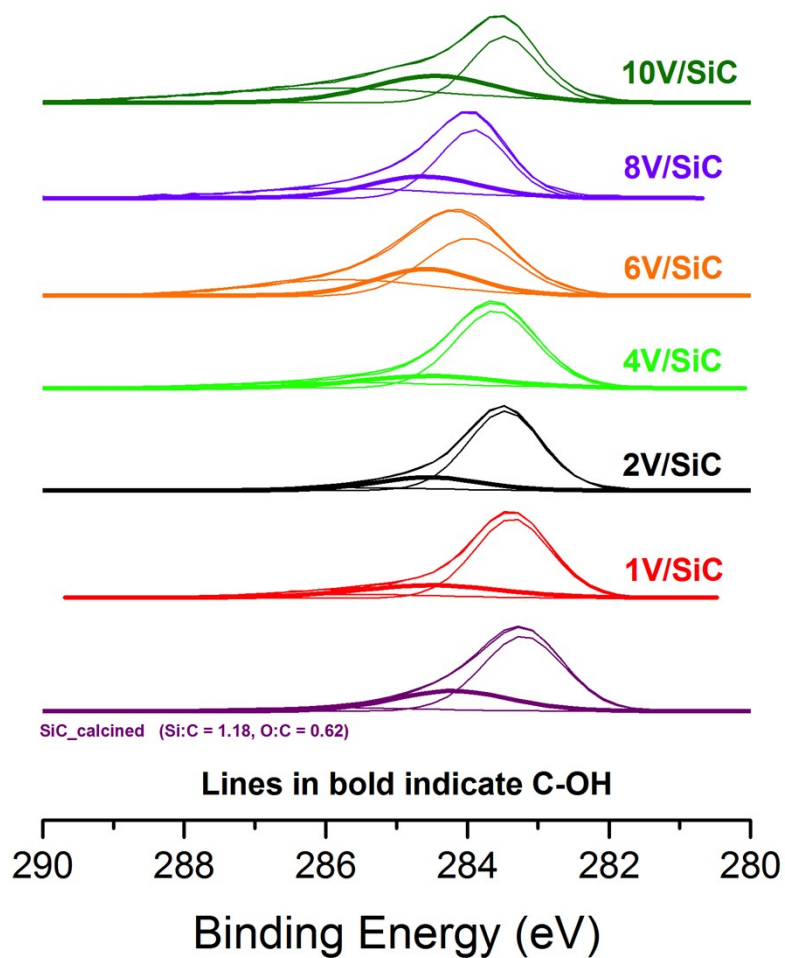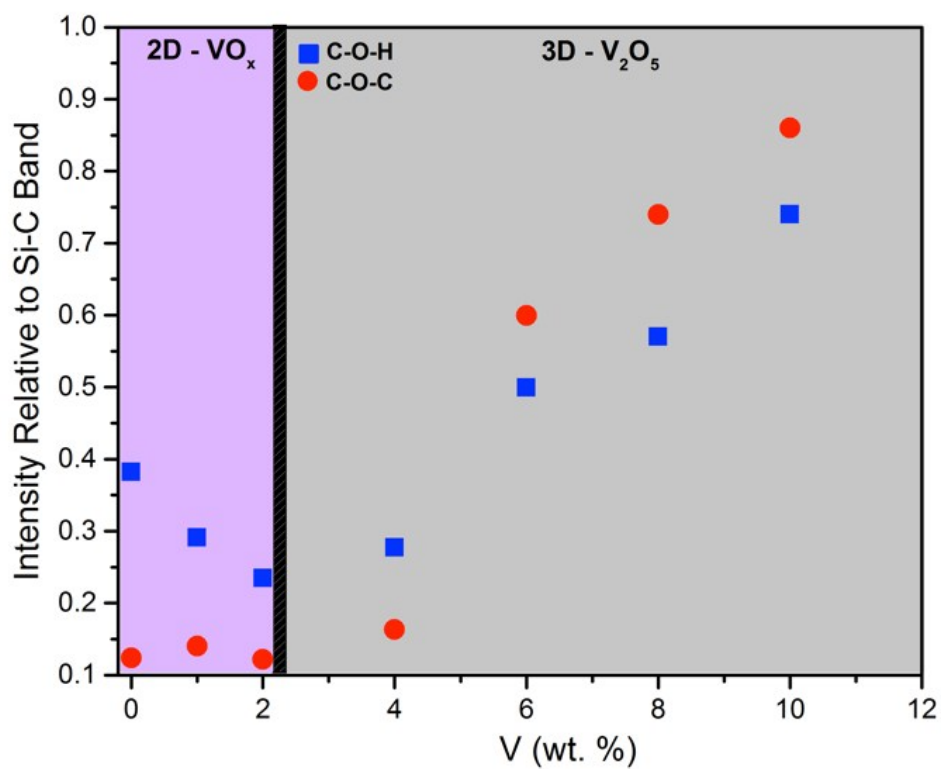

S.6)  $^{51}\text{V}$  MAS NMR spectra of dehydrated  $\text{V}/\beta\text{-SiC}_o$  materials containing 1, 2, 4, and 6 wt.% V, with signal intensity scaled to an equivalent number of scans. The 4 and 6 wt.%  $\text{V}/\beta\text{-SiC}_o$  exhibit a single isotropic shift (denoted by an asterisk, \*) at -616 ppm, whereas no signal is observed in the spectra for 1 and 2 wt.% V.

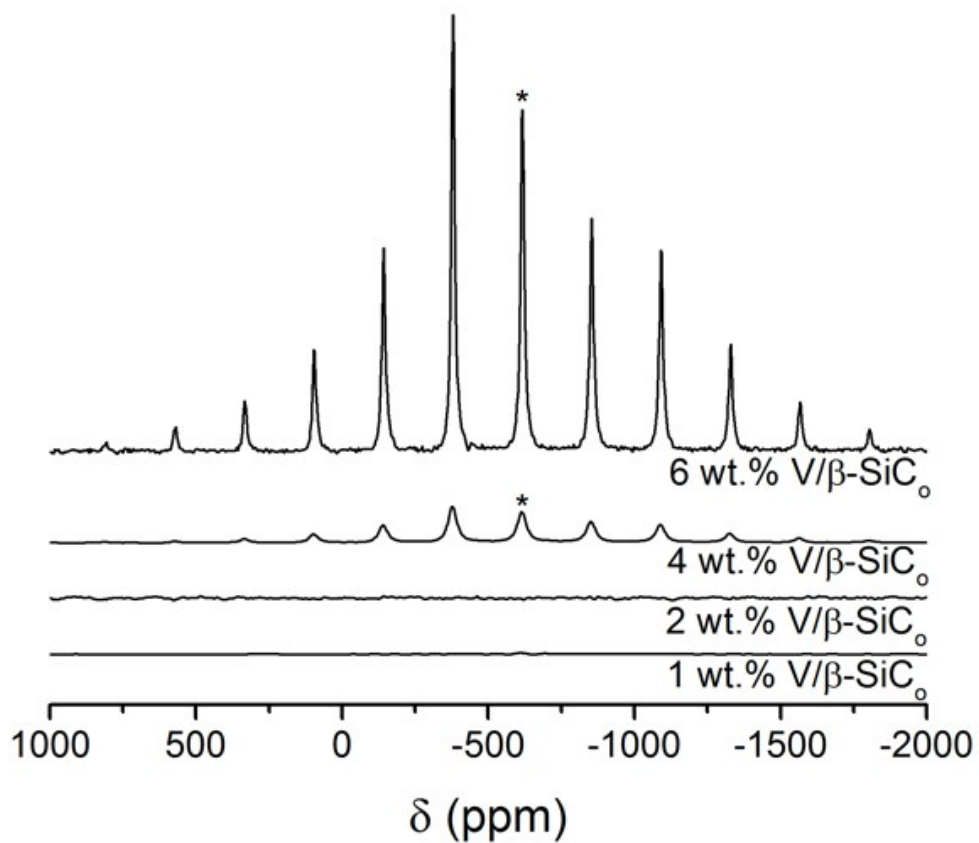

Supplement: c7cy01036b1.pdf [file c7cy01036b1.pdf]
